# Supplementary material
Source: publisher site journal article supplement (https://www.spandidos-publications.com/2815/downloadSupplementary)

Figure S1. HPV E7 affects the function of CasKi cells by regulating lnc-EBIC. (A) The expression of lnc-EBIC in HeLa cells was detected by RT-qPCR. HeLa cells were transfected with siRNA (NC) and silnc-EBIC. (B) The expression of lnc-EBIC in CasKi cells was detected by RT-qPCR. CasKi cells were transfected with siRNA (NC) and silnc-EBIC. (C) The western blot analysis of cellular functional proteins on cell cycle, apoptosis, migration lysates. (D) The fraction of S-phase HPV16 E7 overexpressed CasKi cells was increased with co-transfection of HPV16 E7 and silnc-EBIC. (E) Interference of lnc-EBIC attenuated the effect of HPV E7 on apoptosis in CasKi cells. The percentage of cells in each quadrant is indicated. (F) Transwell assays indicated that interference of lnc-EBIC attenuated the effect of HPV E7 on migration and invasion in CasKi cells. Data are presented as the means  $\pm$  SD, n=3. \*P<0.05 and \*\*P<0.01. HPV, human papillomavirus; lnc, long non-coding RNA; lnc-EBIC, enhancer of zeste homolog 2-binding lncRNA in cervical cancer; RT-qPCR, reverse transcription-quantitative PCR; si, small interfering; NC, negative control.

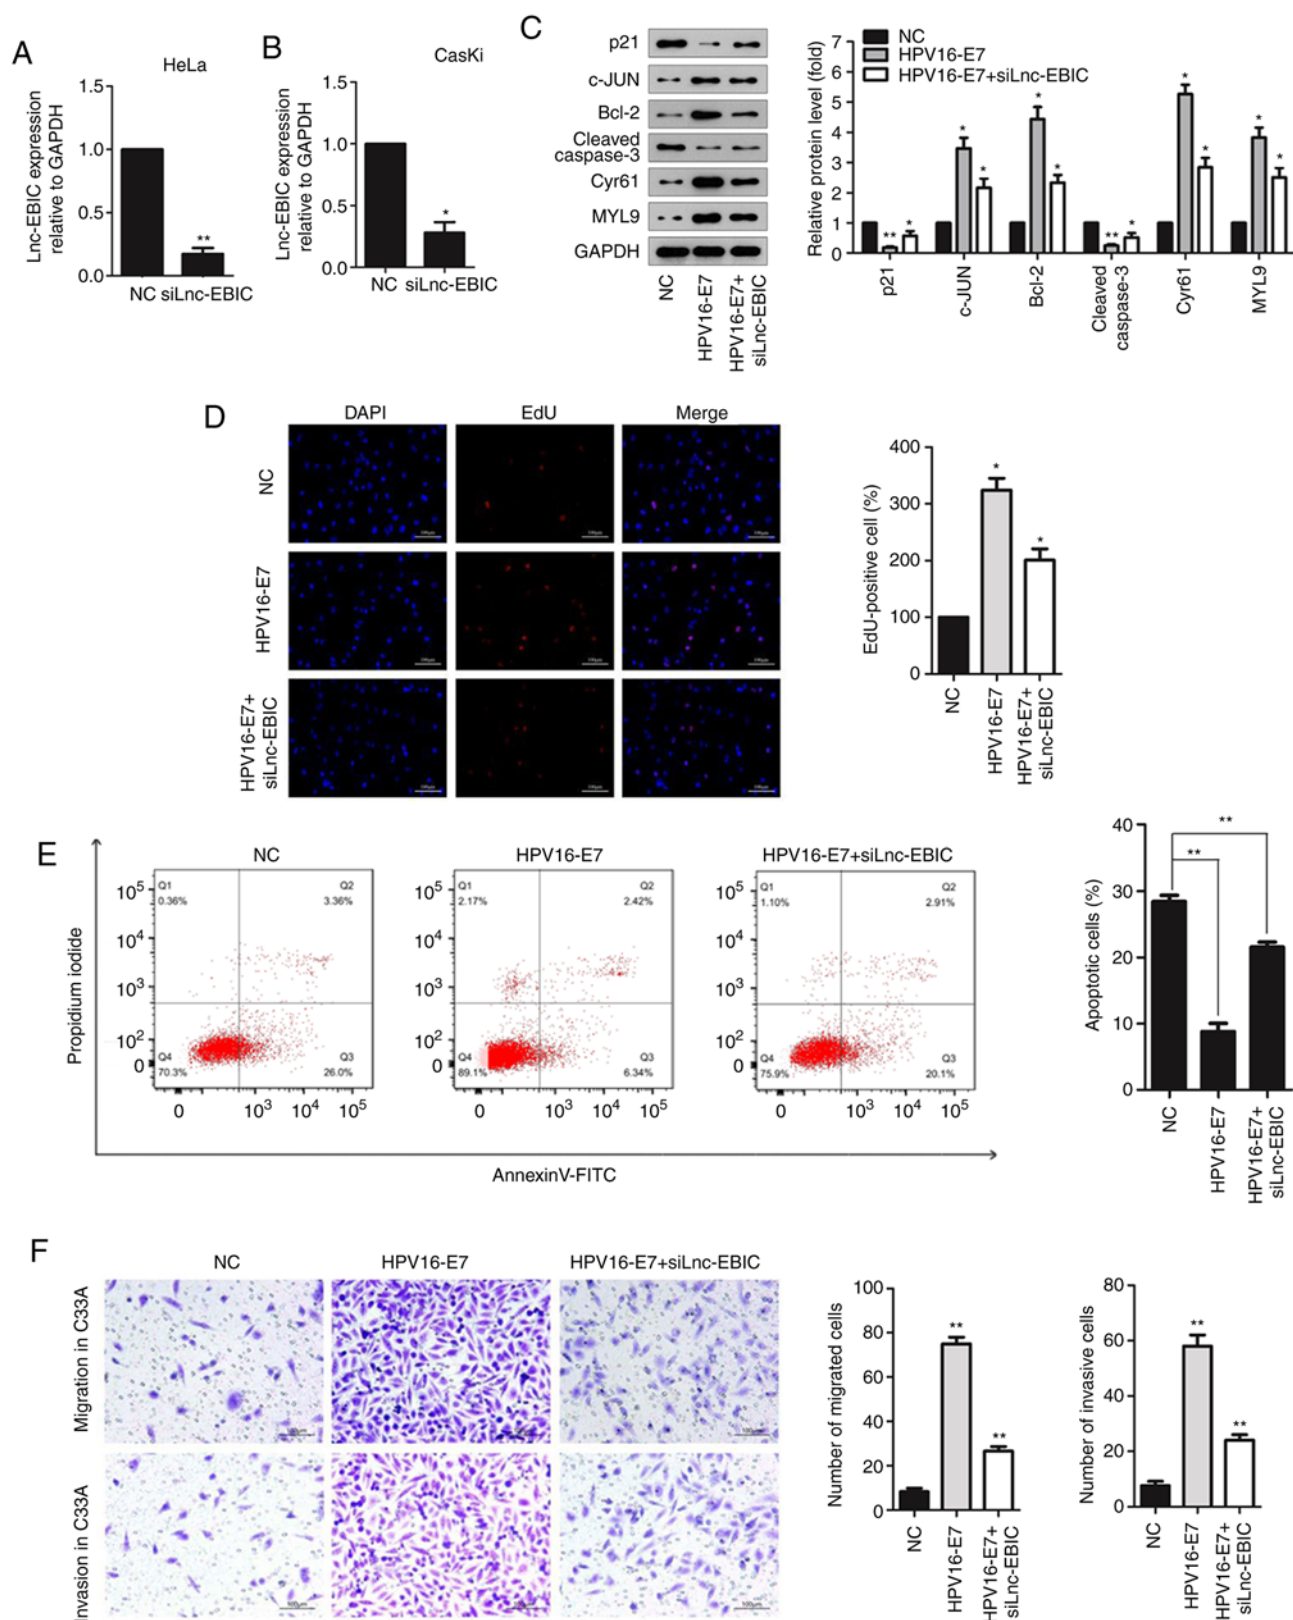

Supplement: Supplementary file 1 [file downloadSupplementary]
